# Supplementary material
Source: publisher site journal article supplement (https://cdn.rupress.org/rup/content_public/journal/jem/217/3/10.1084_jem.20191043/9/jem_20191043_supplementary_data.pdf)
Supplement: Supplementary file 1 [file jem_20191043_supplementary_data.pdf]

## Supplemental material

Davidzohn et al., <https://doi.org/10.1084/jem.20191043>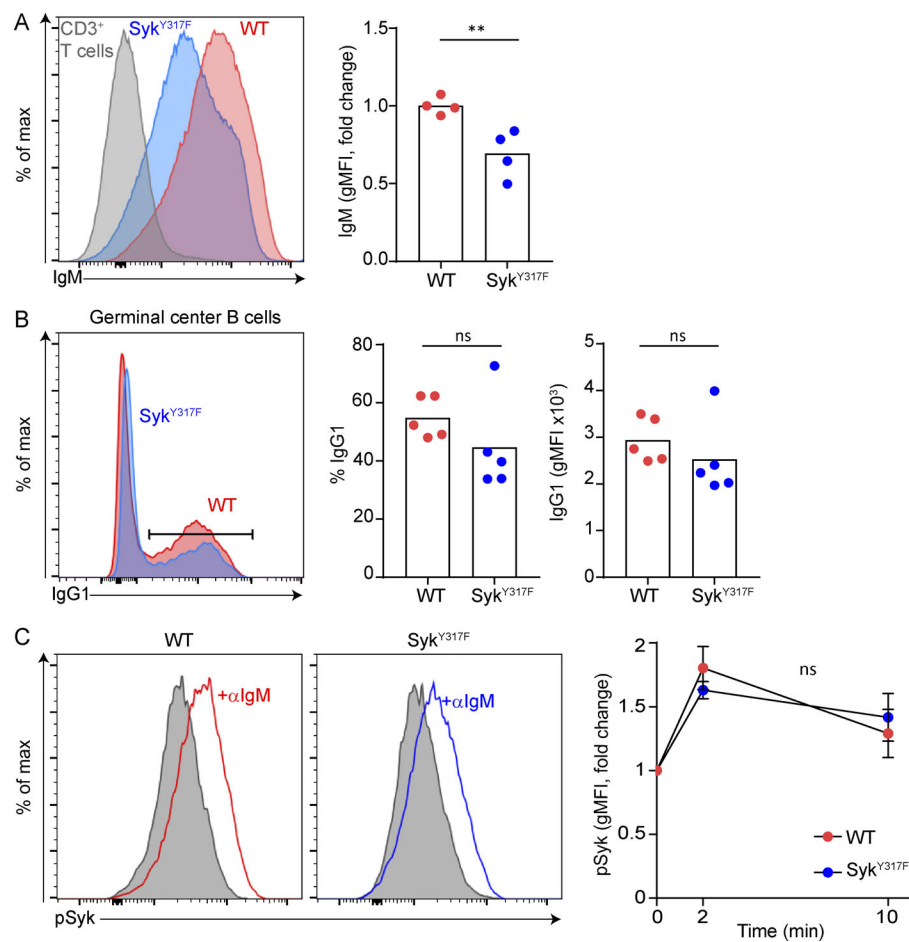

Figure S1. **IgM and IgG1 expression and Syk phosphorylation at position Y348 in WT and Syk<sup>Y317F</sup> mice.** (A and B) Flow cytometry analysis and quantification of IgM expression on WT and Syk<sup>Y317F</sup> follicular B cells (A) and IgG1 expression on WT and Syk<sup>Y317F</sup> GC B cells (B220<sup>+</sup> FAS<sup>+</sup> CD38<sup>low</sup>; B;  $n = 4$  in A and  $n = 5$  in B, two independent experiments, two-tailed Student's  $t$  test). Each dot in the graphs represents a single mouse; bars represent the mean. (C) Flow cytometry histograms and quantification of pSyk in WT and Syk<sup>Y317F</sup> B cells that were left unstimulated or stimulated with anti-IgM at different time points. The gMFI of pSyk (Tyr 348) after 2 and 10 min of stimulation was normalized to the gMFI at time 0. Each graph represents the mean of  $\pm$  SEM ( $n = 3$ , three independent experiments, two-tailed Student's  $t$  test). \*\*,  $P \leq 0.01$ ; ns, not significant.

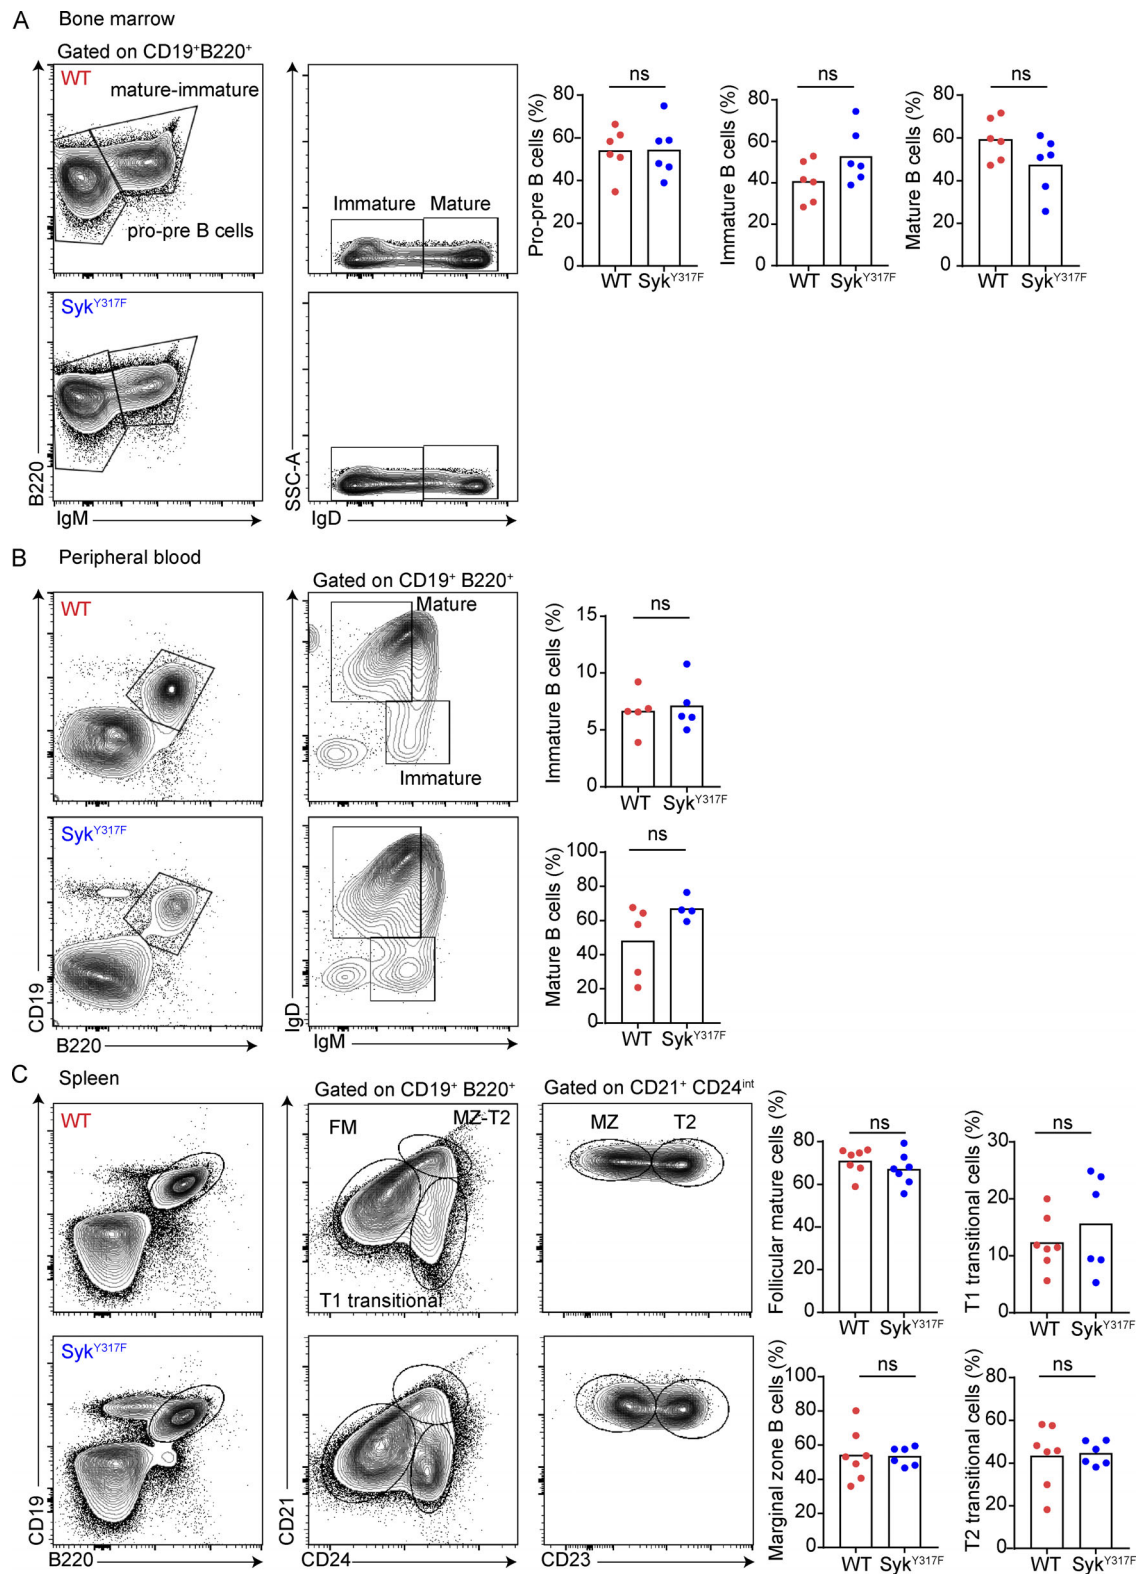

Figure S2. **Syk<sup>Y317F</sup> mice exhibit normal B cell development. (A–C)** Representative flow-cytometric analysis and quantification of Syk<sup>Y317F</sup> and WT B cells in different developmental stages in the BM (A), peripheral blood (B), and spleen (C). Each dot represents a single mouse; bars represent the mean ( $n = 4-7$ , two independent experiments, two-tailed Student's  $t$  test). ns, not significant.

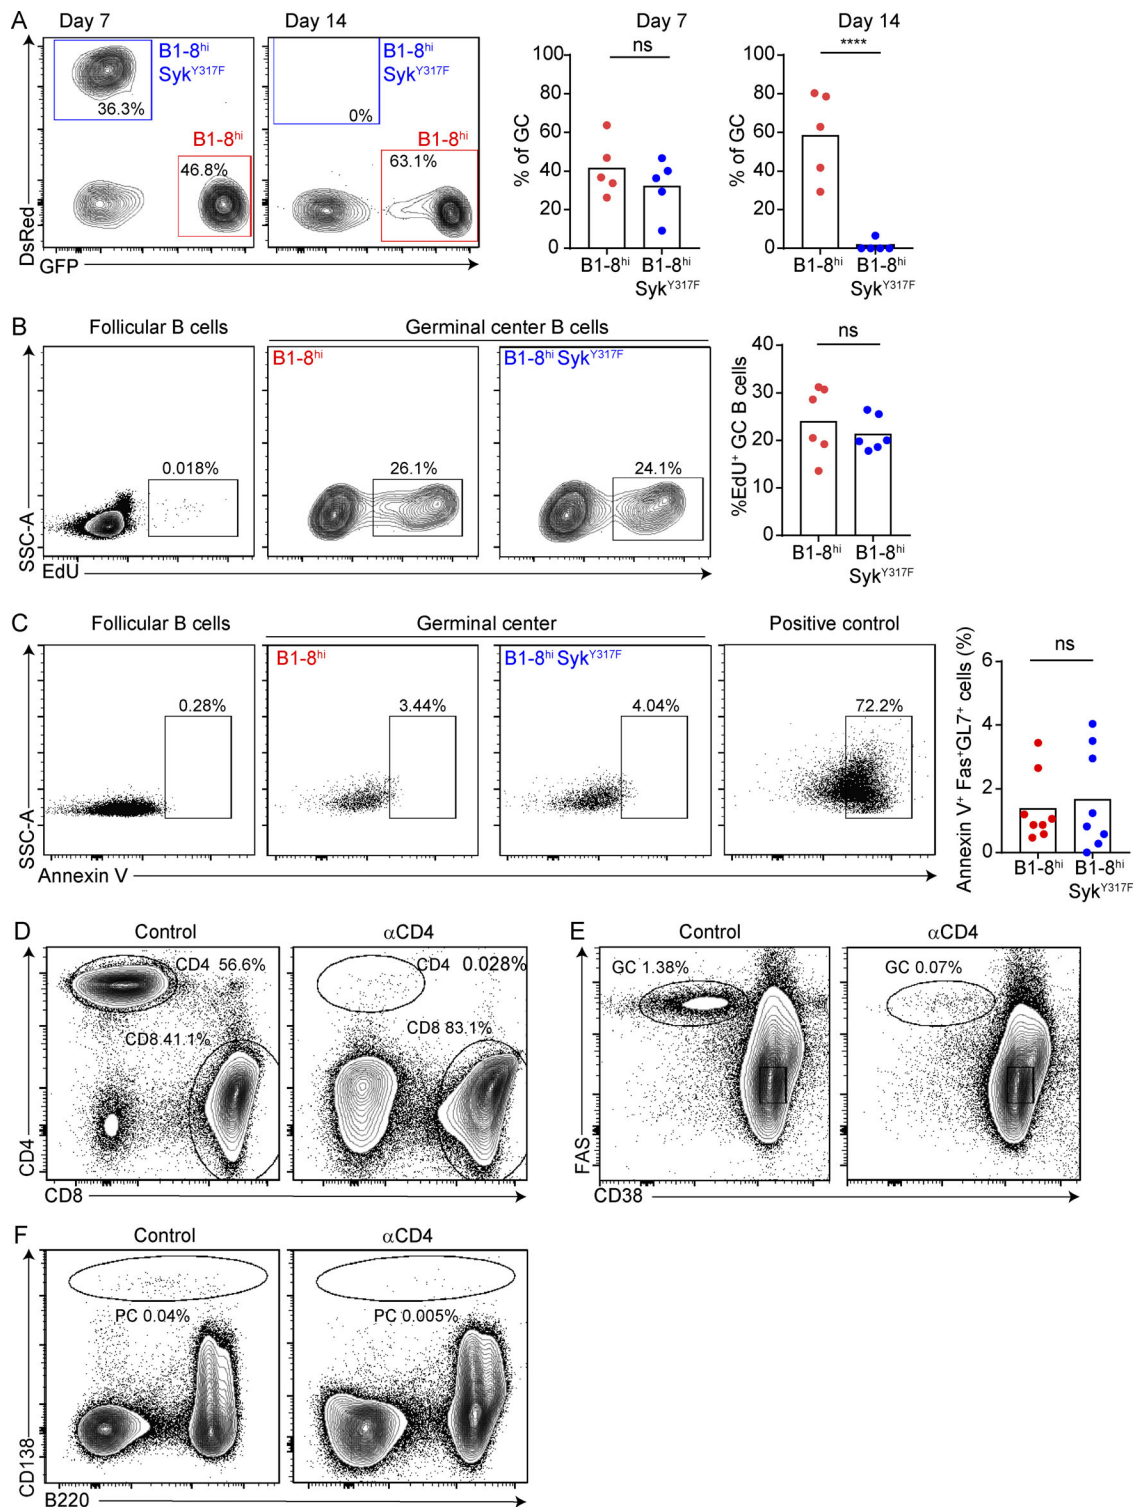

**Figure S3. Syk degradation is required for B cell persistence in GCs independently of their relative BCR affinity in a T cell-dependent manner. (A)** Analysis of transferred B1-8<sup>hi</sup> and B1-8<sup>hi</sup> Syk<sup>Y317F</sup> B cells in GCs (B220<sup>+</sup> Fas<sup>+</sup> CD38<sup>low</sup>) in MD4 recipient mice 7 and 14 d after immunization with NP-OVA. Each dot in the graphs represents a single mouse; bars represent the mean ( $n = 5$ , two independent experiments, two-tailed Student's  $t$  test). **(B and C)** Representative flow-cytometric analysis and quantification of EdU<sup>+</sup> (B) and Annexin V<sup>+</sup> (C) in B1-8<sup>hi</sup> and B1-8<sup>hi</sup> Syk<sup>Y317F</sup> B cells that were cotransferred into WT hosts. Mice were immunized with NP-OVA, and GCs were analyzed 7 d later. Each dot in the graphs represents a single mouse; bars represent the mean ( $n = 6-8$ , two independent experiments, two-tailed Student's  $t$  test). **(D-F)** Gating strategy for CD4<sup>+</sup> T cells (D), GC B cells (E), and PCs (F) following CD4-depleting antibody or PBS injection into NP-KLH-immunized chimeric mice (~50% GFP<sup>+</sup>, ~50% Syk<sup>Y317F</sup>). Quantification of the data are shown in Fig. 4 C. \*\*\*\*,  $P < 0.0001$ ; ns, not significant.

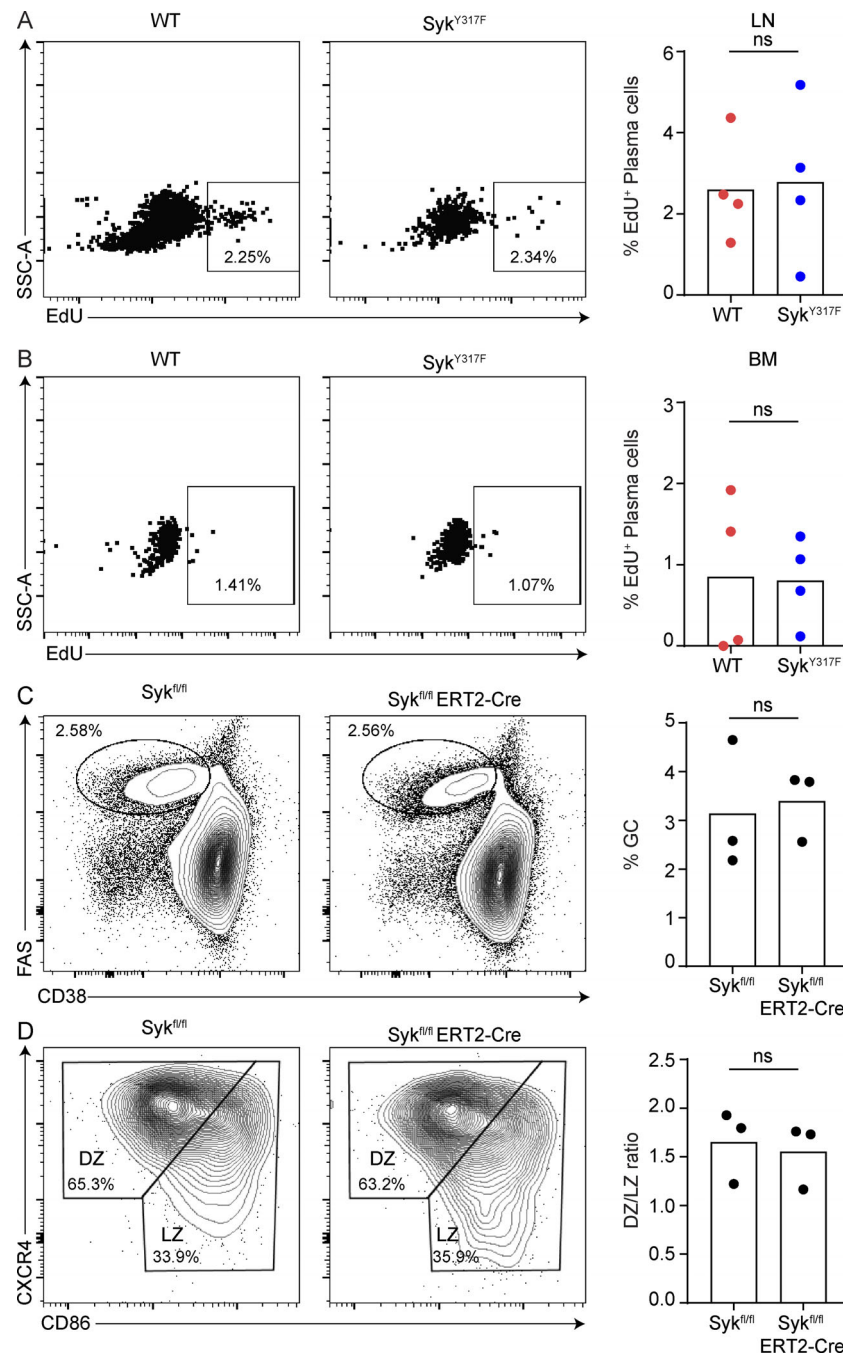

Figure S4. **Short-term EdU incorporation in PCs and ERT2-Cre expression effect on the GC reaction.** (A and B) Representative flow-cytometric plots and quantification of EdU<sup>+</sup> PCs (CD138<sup>+</sup>) in popliteal lymph nodes (A) of NP-KLH immunized mice (day 14) and in the BM (B) 2.5 h after injection of EdU into immunized mice ( $n = 4$ , two independent experiments, two-tailed Student's  $t$  test). (C and D) Representative flow-cytometric plots and quantification of GC size (C), DZ, and LZ (D) GC B cell distribution in Syk<sup>fl/fl</sup> and Syk<sup>fl/fl</sup> ERT2-Cre mice 7 d after immunization without tamoxifen treatment. Each dot in the graphs represents a single mouse; bars represent the mean ( $n = 3$ , one experiment, two-tailed Student's  $t$  test). ns, not significant; SSC-A, side scatter-area.

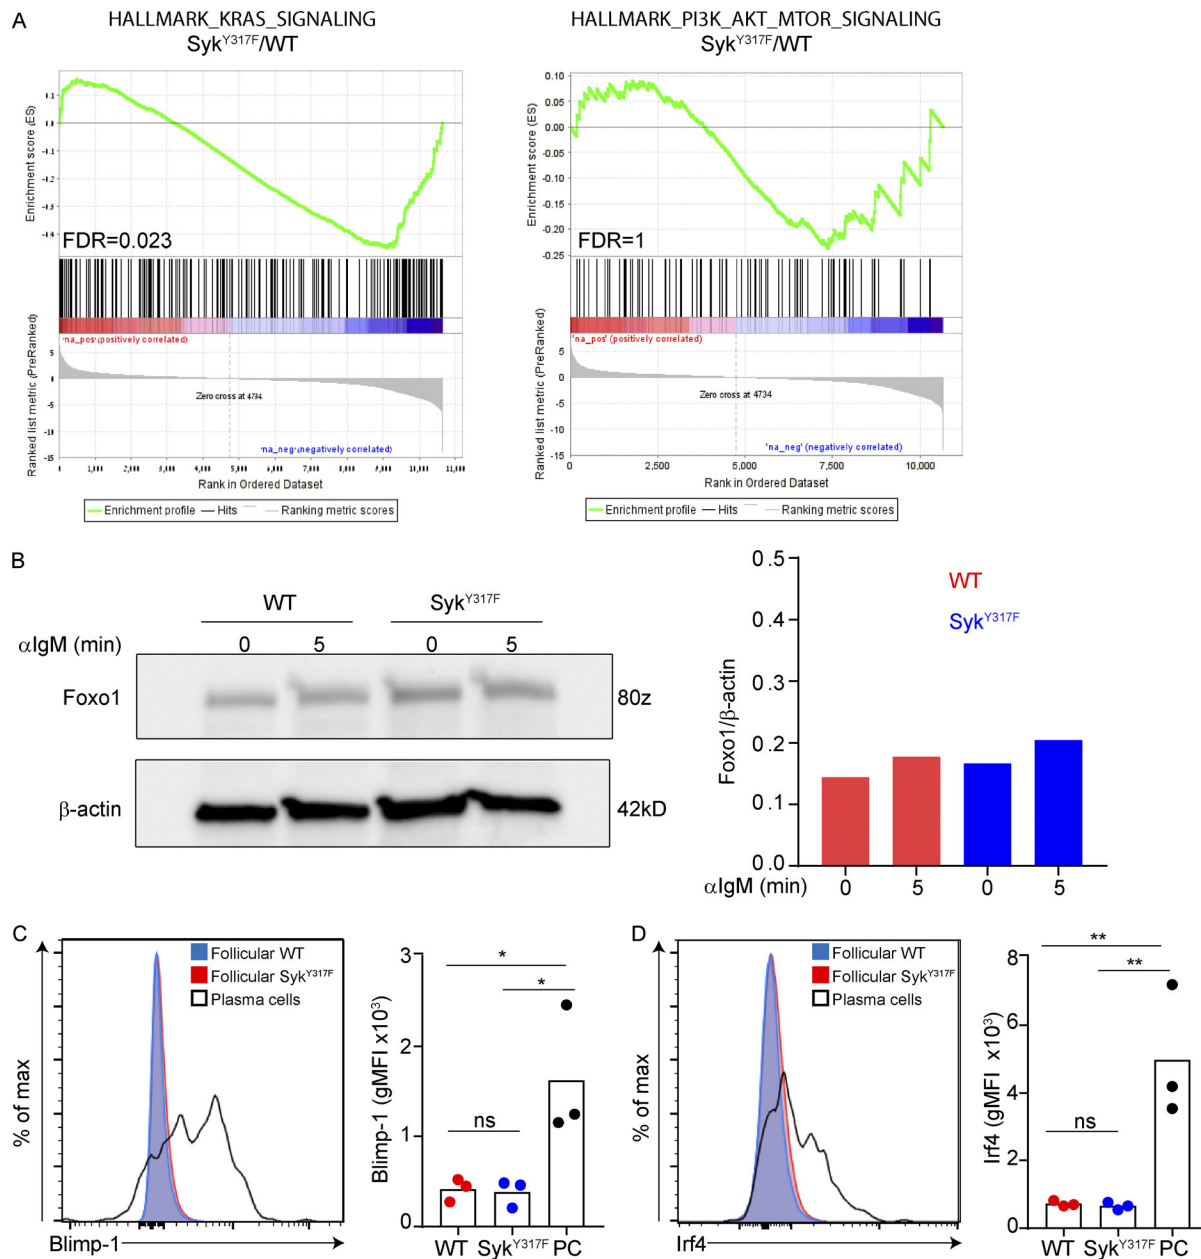

Figure S5. **Changes in gene expression that are related to the Kras and PI3K pathways in WT and  $Syk^{Y317F}$  mice.** (A) GSEA plot showing enrichment of the Kras and PI3K/Akt/MTOR signaling pathways in LZ GC B cells. False discovery rate  $q$  value = 0.023 and false discovery rate  $q$  value = 1, respectively. Analysis is based on the gene expression data shown in Fig. 6. (B) Foxo1 protein levels were determined by Western blot analysis of B cells derived from WT and  $Syk^{Y317F}$  mice that were stimulated with anti-IgM for the indicated time. Signals were normalized to  $\beta$ -actin ( $n = 1$ , one experiment). (C and D) Representative histograms and quantification of Blimp-1 (C) and Irf4 (D) expression in follicular B cells (B220<sup>+</sup>FAS<sup>+</sup>CD38<sup>hi</sup>) and PCs (CD138<sup>+</sup>) of WT and  $Syk^{Y317F}$  mice. Each dot in the graphs represents a single mouse; bars represent the mean ( $n = 3$ , one experiment, two-tailed Student's  $t$  test). ns, not significant; \*,  $P = 0.05$ ; \*\*,  $P \leq 0.01$ .



Table S1. List of antibodies used for flow cytometry

| Antigen           | Fluorophore                     | Clone     | Manufacturer              | Concentration, µg/ml |
|-------------------|---------------------------------|-----------|---------------------------|----------------------|
| B220              | V500                            | RA3-6B2   | BD                        | 1                    |
| B220              | APC-Alexa Fluor 780/e450        | RA3-6B2   | eBioscience               | 1                    |
| CD138             | BV605                           | 281-2     | Biolegend                 | 0.5                  |
| CD38              | FITC                            | 90        | Biolegend                 | 1                    |
| CD38              | Alexa Fluor 700                 | 90        | eBioscience               | 1                    |
| F4/80             | APC-Alexa Fluor 780             | BM8       | eBioscience               | 1                    |
| FAS               | PE-Cy7                          | Jo2       | BD                        | 0.33                 |
| GL-7              | Alexa Fluor 647/PerCP-Cy5.5     | GL7       | Biolegend                 | 2.5                  |
| Gr-1              | APC-Alexa Fluor 780             | RB6-8C5   | eBioscience               | 1                    |
| Igλ               | PE                              | RML-42    | Biolegend                 | 1                    |
| Streptavidin      | Alexa Fluor 647                 |           | Biolegend                 | 1                    |
| IgM               | Biotin                          | RMM-1     | Biolegend                 | 1                    |
| IgM               | PerCP-CeFluor710                | II/41     | eBioscience               | 1                    |
| IgG1              | BV421/FITC                      | RMG1-1    | Biolegend                 | 1                    |
| IgD               | Alexa Fluor 647                 | 11-26c.2a | Biolegend                 | 1                    |
| CD4               | Alexa Fluor 488/Alexa Fluor 780 | GK1.5     | Biolegend                 | 1                    |
| CD8               | Pacific Blue                    | 53-6.7    | Biolegend                 | 1                    |
| CD8               | Alexa Fluor 780                 | 53-6.7    | eBioscience               | 1                    |
| CD19              | Pacific Blue                    | 6D5       | Biolegend                 | 1                    |
| CD19              | FITC                            | MB19-1    | Biolegend                 | 1                    |
| CD3               | PE                              | 145-2C11  | Biolegend                 | 1                    |
| CD21              | APC-Cy7                         | 7E9       | Biolegend                 | 1                    |
| CD24              | PeCy7                           | M1/69     | Biolegend                 | 1                    |
| CD23              | FITC                            | B3B4      | Biolegend                 | 1                    |
| CXCR4             | BV421                           | L276F12   | Biolegend                 | 1                    |
| CD86              | PE/FITC                         | GL-1      | Biolegend                 | 0.08                 |
| pERK              | Alexa Fluor 488                 | 4B11B69   | Biolegend                 | 2.5                  |
| CD45.1            | BV421                           | A20       | Biolegend                 | 1                    |
| CD45.1            | Alexa Fluor 780                 | A20       | eBioscience               | 1                    |
| CD45.2            | PE                              | 104       | Biolegend                 | 1                    |
| Blimp-1           | Alexa Fluor 647                 | 5E7       | Biolegend                 | 1                    |
| Irf4              | Alexa Fluor 488/PerCP-Cy5.5     | IRF4.3E4  | Biolegend                 | 1                    |
| p-S6 (Ser235/236) | Alexa Fluor 647                 | D57.2.2E  | Cell Signaling Technology | 1                    |
| pSyk ab           | PE                              | moch1ct   | eBioscience               | 1                    |

Table S2. List of primers used for Igy1 sequencing

| Primers                               | Primer sequence 5'-3'                              |
|---------------------------------------|----------------------------------------------------|
| <b>Variable region primers</b>        |                                                    |
| HP1F-mLEADER-1                        | GTAACACTTTTAAATGGTATCCAGTGT                        |
| HP1F-mLEADER-2                        | GTCCTAATTTTAAAAGGTGTCCAGTGT                        |
| HP1F-mLEADER-3                        | AGCAACAGCTACAGGTGTCCACTCC                          |
| HP1F-mLEADER-4                        | TCTTCTCCTGTGAGTAACATRCAGG                          |
| HP1F-mLEADER-5                        | TTGCTATTCCTGATGGCAGCTGCCCAA                        |
| HP1F-mLEADER-6                        | GTGACATTCCCAAGCTGTGTCCTRTCC                        |
| HP1F-mLEADER-7                        | TGTACCTGTTGACAGTCGTTCTCTGG                         |
| HP1F-mLEADER-8                        | GTTTTTTATCAAGGTGTGCATTGT                           |
| HP1F-mLEADER-9                        | CTATTCCTGATGGCAGCTGCCCAAAG                         |
| <b>VH186.2 variable region primer</b> | CTAGTAGCAACTGCAACCGGTGTACATTCTCAGGTGCAGCTGCAGGAGTC |
| <b>Constant region primers</b>        |                                                    |
| Cy1-outer                             | GGAAGGTGTGCACACCGCTGGAC                            |
| Cy1-inner                             | GCTCAGGGAAATAGCCCTTGAC                             |
